# Supplementary material for: Cardiovascular Morbidity and Mortality in Adult Patients With Repaired Aortic Coarctation
Source: PubMed Central journal article supplement — J Am Heart Assoc. 2021 Nov 10;10(22):e023199. doi: 10.1161/JAHA.121.023199 (PMC8751912; doi:10.1161/jaha.121.023199), 2021-11-10
Supplement: JAH3-10-e023199-s001.pdf [file JAH3-10-e023199-s001.pdf]

# **Supplemental Material**

**Table S1. Estimated yearly risk of specific types of cardiovascular events at various ages (supplemental to Figure 1B).**

| Age (y)   | Arrhythmia  |                         | CV death    |                         | Stroke/TIA  |                         | Aortic complication |                         | HF hospitalization |                         | CAD         |                         | Endocarditis |                         |
|-----------|-------------|-------------------------|-------------|-------------------------|-------------|-------------------------|---------------------|-------------------------|--------------------|-------------------------|-------------|-------------------------|--------------|-------------------------|
|           | No. at risk | Yearly risk, % (95% CI) | No. at risk | Yearly risk, % (95% CI) | No. at risk | Yearly risk, % (95% CI) | No. at risk         | Yearly risk, % (95% CI) | No. at risk        | Yearly risk, % (95% CI) | No. at risk | Yearly risk, % (95% CI) | No. at risk  | Yearly risk, % (95% CI) |
| <b>20</b> | 242         | 0.25<br>(0.16-0.40)     | 243         | 0.03<br>(0.01-0.09)     | 243         | 0.07<br>(0.03-0.15)     | 228                 | 0.49<br>(0.32-0.74)     | 243                | 0.02<br>(0.01-0.07)     | 243         | 0.02<br>(0.005-0.06)    | 243          | 0.07<br>(0.03-0.17)     |
| <b>30</b> | 287         | 0.48<br>(0.36-0.66)     | 297         | 0.08<br>(0.04-0.17)     | 295         | 0.15<br>(0.09-0.25)     | 284                 | 0.81<br>(0.62-1.06)     | 296                | 0.05<br>(0.02-0.13)     | 297         | 0.04<br>(0.02-0.11)     | 295          | 0.11<br>(0.06-0.21)     |
| <b>40</b> | 184         | 0.89<br>(0.69-1.15)     | 197         | 0.20<br>(0.12-0.34)     | 195         | 0.30<br>(0.20-0.46)     | 187                 | 1.17<br>(0.90-1.52)     | 197                | 0.13<br>(0.07-0.24)     | 197         | 0.10<br>(0.05-0.21)     | 193          | 0.17<br>(0.10-0.29)     |
| <b>50</b> | 104         | 1.57<br>(1.20-2.05)     | 110         | 0.48<br>(0.32-0.75)     | 107         | 0.61<br>(0.41-0.91)     | 103                 | 1.40<br>(1.02-1.91)     | 111                | 0.30<br>(0.18-0.51)     | 108         | 0.25<br>(0.14-0.44)     | 109          | 0.26<br>(0.15-0.48)     |
| <b>60</b> | 41          | 2.60<br>(1.87-3.62)     | 46          | 1.11<br>(0.70-1.76)     | 45          | 1.21<br>(0.75-1.94)     | 44                  | 1.50<br>(0.97-2.33)     | 46                 | 0.70<br>(0.39-1.24)     | 44          | 0.58<br>(0.30-1.09)     | 46           | 0.39<br>(0.18-0.88)     |
| <b>70</b> | 14          | 4.22<br>(2.64-6.76)     | 17          | 2.51<br>(1.37-4.58)     | 13          | 2.27<br>(1.18-4.34)     | 16                  | 1.57<br>(0.79-3.13)     | 17                 | 1.56<br>(0.73- 3.36)    | 16          | 1.29<br>(0.55-3.01)     | 17           | 0.57<br>(0.19-1.70)     |

CAD, coronary artery disease; CV, cardiovascular; HF, heart failure; TIA, transient ischemic attack; y, years.

**Table S2. Overview of cardiovascular events in CoA patients with and without a left-sided MHV.**

|                                                 | Left-sided MHV (n = 60) |                                        | No left-sided MHV (n = 860) |                                        |
|-------------------------------------------------|-------------------------|----------------------------------------|-----------------------------|----------------------------------------|
|                                                 | No. of cases            | Incidence /<br>1,000 patient-<br>years | No. of cases                | Incidence /<br>1,000 patient-<br>years |
| <b>Coronary artery disease</b>                  | <b>2</b>                | <b>3.4</b>                             | <b>12</b>                   | <b>1.5</b>                             |
| Myocardial infarction                           | 1                       | 1.7                                    | 5                           | 0.6                                    |
| Coronary revascularization                      | 1                       | 1.7                                    | 5                           | 0.6                                    |
| Stable angina, medically treated                | 0                       | 0                                      | 2                           | 0.3                                    |
| <b>Stroke/TIA</b>                               | <b>11</b>               | <b>18.4</b>                            | <b>23</b>                   | <b>2.9</b>                             |
| Ischemic stroke                                 | 4                       | 6.7                                    | 14                          | 1.8                                    |
| Hemorrhagic stroke, intracerebral               | 0                       | 0                                      | 1                           | 0.1                                    |
| Hemorrhagic stroke, subarachnoidal              | 0                       | 0                                      | 1                           | 0.1                                    |
| TIA                                             | 7                       | 11.7                                   | 7                           | 0.9                                    |
| <b>Aortic complication</b>                      | <b>5</b>                | <b>8.4</b>                             | <b>79</b>                   | <b>10.0</b>                            |
| Aneurysm                                        | 4                       | 6.7                                    | 73                          | 9.2                                    |
| Dissection                                      | 1                       | 1.7                                    | 6                           | 0.8                                    |
| <b>Arrhythmia</b>                               | <b>24</b>               | <b>40.2</b>                            | <b>60</b>                   | <b>7.6</b>                             |
| Supraventricular arrhythmia                     | 16                      | 26.8                                   | 42                          | 5.3                                    |
| Ventricular arrhythmia                          | 7                       | 11.7                                   | 11                          | 1.4                                    |
| Conduction disturbance                          | 1                       | 1.7                                    | 7                           | 0.9                                    |
| <b>Heart failure hospitalization</b>            | <b>6</b>                | <b>10.1</b>                            | <b>9</b>                    | <b>1.1</b>                             |
| <b>Endocarditis</b>                             | <b>4</b>                | <b>6.7</b>                             | <b>11</b>                   | <b>1.4</b>                             |
| <b>CV death</b>                                 | <b>7</b>                | <b>11.7</b>                            | <b>17</b>                   | <b>2.1</b>                             |
| <b>Total CV events</b>                          | <b>59</b>               | <b>98.9</b>                            | <b>211</b>                  | <b>26.6</b>                            |
| <b>No. of individual patients with CV event</b> | <b>36</b>               | <b>NA</b>                              | <b>155</b>                  | <b>NA</b>                              |

CV, cardiovascular; MHV, mechanical heart valve; NA, not applicable; TIA, transient ischemic attack.

**Table S3. Addition of age at baseline to the multivariable Cox proportional-hazards regression to identify factors associated with the risk of cardiovascular events.**

|                                   | Cardiovascular event |                  |
|-----------------------------------|----------------------|------------------|
|                                   | HR (95% CI)          | <i>p</i> -value  |
| Female sex                        | 0.82 (0.59-1.15)     | 0.25             |
| Age at baseline (y)               | 0.95 (0.92-0.99)     | <b>0.01</b>      |
| Age at initial CoA repair (y)     | 1.021 (1.004-1.039)  | <b>0.01</b>      |
| Bicuspid aortic valve             | 1.31 (0.95-1.80)     | 0.09             |
| Ventricular septal defect         | 1.03 (0.70-1.52)     | 0.88             |
| Prior CAD                         | 2.30 (0.86-6.18)     | 0.10             |
| Prior stroke/TIA                  | 1.91 (0.93-3.92)     | 0.08             |
| Prior arrhythmia                  | 1.61 (0.95-2.71)     | 0.08             |
| Systolic BP (mmHg)                | 1.004 (0.995-1.013)  | 0.37             |
| Diastolic BP (mmHg)               | 1.012 (0.997-1.028)  | 0.12             |
| BMI (kg/m <sup>2</sup> )          | 1.03 (1.00-1.06)     | 0.05             |
| Hypercholesterolemia              | 1.50 (1.00-2.26)     | 0.05             |
| Diabetes mellitus                 | 0.50 (0.20-1.24)     | 0.13             |
| Cigarette smoking                 | 1.15 (0.81-1.62)     | 0.43             |
| Family history of premature CVD   | 1.24 (0.71-2.16)     | 0.44             |
| LV mass index (g/m <sup>2</sup> ) | 1.009 (1.005-1.013)  | <b>&lt;0.001</b> |

A total of 920 patients were included in the analysis, of whom 191 patients developed a cardiovascular event.

BMI, body mass index; BP, blood pressure; CAD, coronary artery disease; CV, cardiovascular; CVD, cardiovascular disease; HR, hazard ratio; LV, left ventricular; TIA, transient ischemic attack; y, years.

**Table S4. Overview of causes of mortality.**

| <b>Cause of mortality</b>              | <b>Total<br/>n = 42</b> | <b>Age at death (y)<br/>median (range)</b> |
|----------------------------------------|-------------------------|--------------------------------------------|
| <b>Cardiovascular</b>                  | <b>24</b>               | <b>48 (25-79)</b>                          |
| Sudden cardiac death                   | 10                      | 49 (25-77)                                 |
| Heart failure                          | 8                       | 54 (35-79)                                 |
| Spontaneous thoracic aortic dissection | 2                       | 62 (57-67)                                 |
| Iatrogenic thoracic aortic dissection  | 1                       | 42                                         |
| Myocardial infarction                  | 1                       | 40                                         |
| Endocarditis                           | 1                       | 44                                         |
| Ischemic stroke                        | 1                       | 45                                         |
| <b>Non-cardiovascular</b>              | <b>17</b>               | <b>49 (30-84)</b>                          |
| Malignancy                             | 6                       | 35 (30-49)                                 |
| Sepsis                                 | 3                       | 50 (33-65)                                 |
| Gastrointestinal hemorrhage            | 2                       | 72 (59-84)                                 |
| Renal hemorrhage                       | 1                       | 51                                         |
| Other                                  | 5                       | 58 (30-75)                                 |
| Unknown                                | 1                       | 72                                         |

y, years.

**Figure S1. Freedom from a cardiovascular event in subgroups based on age at initial CoA repair.**

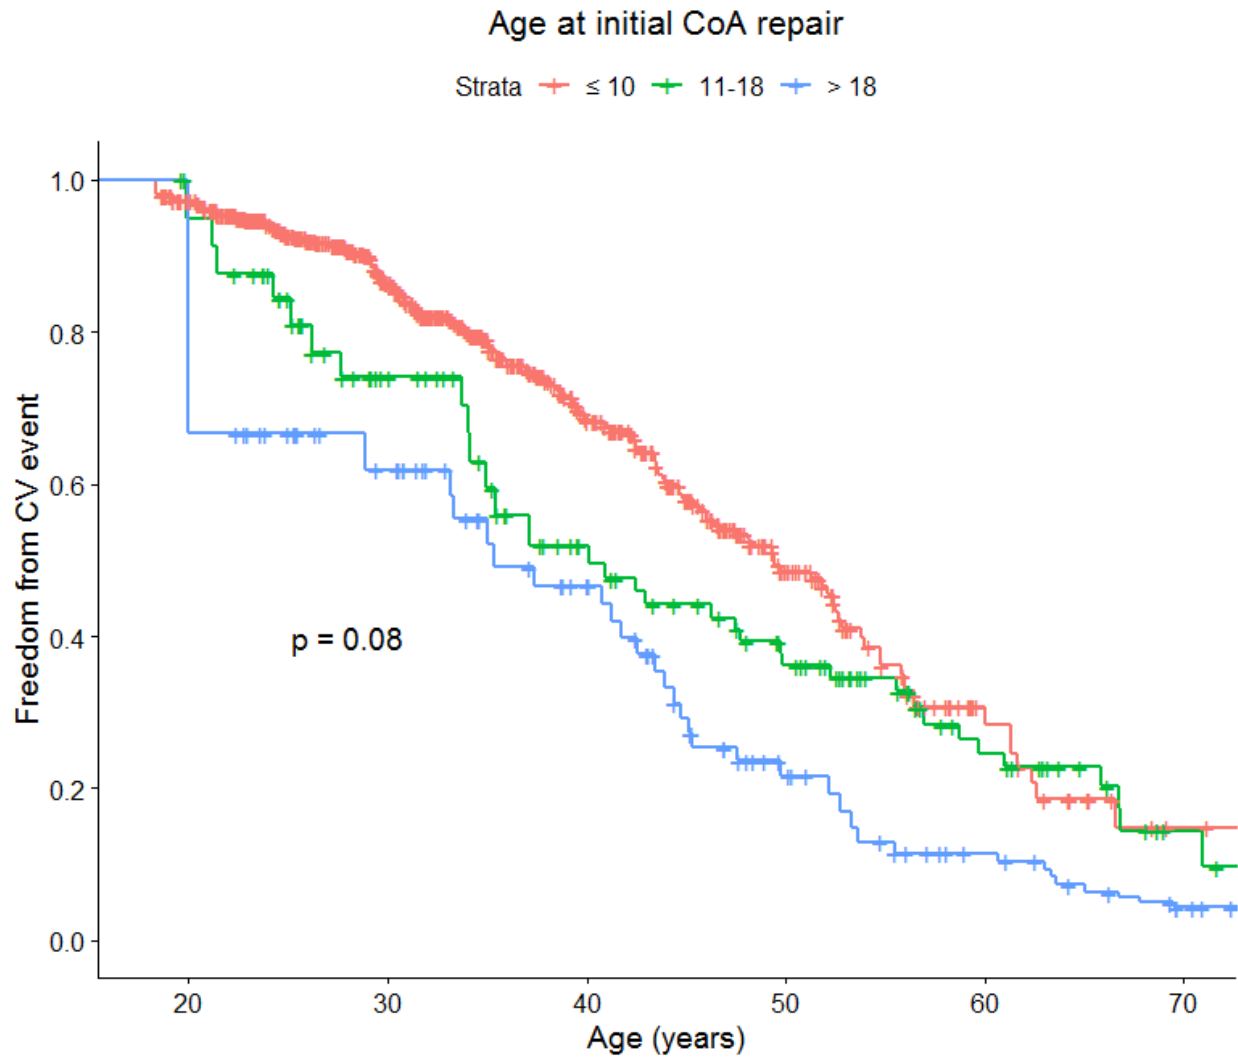

Kaplan-Meier graph showing the freedom from a cardiovascular event in three subgroups based on the age at initial CoA repair ( $\leq 10$  years, 11-18 years, and  $> 18$  years). CV, cardiovascular.
